# Supplementary material for: The natural history of multiple system atrophy: a prospective European cohort study
Source: PubMed Central journal article supplement — Lancet Neurol. 2013 Mar 13;12(3):264–74. doi: 10.1016/S1474-4422(12)70327-7 (PMC3581815; doi:10.1016/s1474-4422(12)70327-7), 2013-03-13
Supplement: mmc1.pdf [file mmc1.pdf]

# THE LANCET **Neurology**

## **Supplementary webappendix**

This webappendix formed part of the original submission and has been peer reviewed. We post it as supplied by the authors.

Supplement to: Wenning GK, Geser F, Krismer F, et al, for The European Multiple System Atrophy Study Group. The natural history of multiple system atrophy: a prospective European cohort study. *Lancet Neurol* 2013; published online Feb 5. [http://dx.doi.org/10.1016/S1474-4422\(12\)70327-7](http://dx.doi.org/10.1016/S1474-4422(12)70327-7).

## Supplementary Material

### Supplementary Figure 1 Kaplan Meier analysis of time from baseline visit to death stratified by median baseline UMSARS score

Legend: Group “Baseline UMSARS scores below median” – UMSARS scores 0 – 48·9, Group “Baseline UMSARS scores above median” UMSARS scores above 49.

**Supplementary Table 1. Progression of clinical scales (complete-case per protocol analysis; sensitivity analysis to linear interpolation approach)**

| N                               | 6-month follow-up   |                  |                                              | 12-month follow-up |                                              | 18-month follow-up |                                              | 24-month follow-up |                                              |            |
|---------------------------------|---------------------|------------------|----------------------------------------------|--------------------|----------------------------------------------|--------------------|----------------------------------------------|--------------------|----------------------------------------------|------------|
|                                 | Baseline, mean (SD) | Score, mean (SD) | Difference, mean (SD) (compared to baseline) | Score, mean (SD)   | Difference, mean (SD) (compared to baseline) | Score, mean (SD)   | Difference, mean (SD) (compared to baseline) | Score, mean (SD)   | Difference, mean (SD) (compared to baseline) |            |
| <b>UMSARS</b>                   | 22                  | 44·4 (16·5)      | 52·2 (17·8)                                  | 7·8 (7·3)          | 58·4 (18·5)                                  | 14 (11·1)          | 62·9 (18·2)                                  | 18·5 (10·4)        | 67·4 (17·9)                                  | 23 (9·9)   |
| Activities of daily living      | 22                  | 22 (7·9)         | 25·3 (8·8)                                   | 3·3 (4·3)          | 29 (9·7)                                     | 7 (6)              | 30·8 (9·2)                                   | 8·8 (5·2)          | 32·2 (9·4)                                   | 10·2 (5·6) |
| Motor examination               | 22                  | 22·4 (9·3)       | 26·9 (9·6)                                   | 4·5 (4·0)          | 29·4 (9·3)                                   | 7 (5·9)            | 32·1 (9·9)                                   | 9·7 (5·9)          | 35·2 (9·1)                                   | 12·8 (5·2) |
| <b>Global Disability Scale</b>  | 22                  | 2·1 (0·7)        | 2·1 (0·7)                                    | 0 (0·5)            | 2·5 (0·5)                                    | 0·4 (0·5)          | 2·7 (0·5)                                    | 0·6 (0·5)          | 2·7 (0·5)                                    | 0·6 (0·6)  |
| <b>Hoehn &amp; Yahr staging</b> | 22                  | 3·6 (0·7)        | 3·8 (0·8)                                    | 0·2 (0·6)          | 4·1 (0·8)                                    | 0·5 (0·6)          | 4·3 (0·8)                                    | 0·7 (0·8)          | 4·2 (1·2)                                    | 0·6 (1·1)  |
| <b>Schwab &amp; England ADL</b> | 22                  | 5·9 (1·7)        | 5 (2·3)                                      | -0·9 (1·4)         | 4·3 (2)                                      | -1·6 (1·3)         | 3·6 (2·1)                                    | -2·3 (1·3)         | 3·1 (2·1)                                    | -2·7 (1·4) |

The present table presents data from the complete-case per protocol analysis that constrains evaluation to patients having a complete data-set (no missing value at any of the time points). This analysis was performed as sensitivity analysis to the linear interpolation approach.

Abbreviations: UMSARS ... unified MSA rating scale, SD ... standard deviation

**Supplementary Table 2. Quality of Life in MSA Patients**

|                                                   | Baseline                               | 6-Month Follow-Up                       | 12-Month Follow-Up                      | 18-Month Follow-Up                     | 24-Month Follow-Up                      |
|---------------------------------------------------|----------------------------------------|-----------------------------------------|-----------------------------------------|----------------------------------------|-----------------------------------------|
| <b>EQ-5D</b>                                      |                                        |                                         |                                         |                                        |                                         |
| EQ-5D Index Score, mean (n, median, SD, 95%CI)    | 0.35 (78; 0.52; 0.33; 0.27 - 0.42)     | 0.28 (80; 0.26; 0.34; 0.2 - 0.35)       | 0.21 (55; 0.15; 0.34; 0.12 - 0.31)      | 0.17 (45; 0.14; 0.37; 0.06 - 0.28)     | 0.16 (32; 0.15; 0.31; 0.05 - 0.27)      |
| <b>SF-36 Summary Scores</b>                       |                                        |                                         |                                         |                                        |                                         |
| Physical Functioning, mean (n, median, SD, 95%CI) | 16.99 (73; 10; 19.79; 12.45 - 21.53)   | 16.78 (74; 5; 24.05; 11.3 - 22.26)      | 12.04 (55; 0; 23.08; 5.94 - 18.14)      | 8.04 (37; 0; 12.33; 4.07 - 12.01)      | 7.83 (24; 0; 13.04; 2.61 - 13.04)       |
| Role-Physical, mean (n, median, SD, 95%CI)        | 23.36 (73; 0; 33.24; 15.73 - 30.98)    | 13.21 (74; 0; 24.35; 7.67 - 18.76)      | 14.9 (55; 0; 24.38; 8.46 - 21.35)       | 13.24 (37; 0; 25.55; 5 - 21.47)        | 13.1 (24; 0; 26.95; 2.31 - 23.88)       |
| Bodily Pain, mean (n, median, SD, 95%CI)          | 44.95 (73; 52; 26.87; 38.78 - 51.11)   | 55.43 (74; 52; 30.8; 48.41 - 62.45)     | 61.06 (55; 51; 31.9; 52.63 - 69.49)     | 67.52 (37; 72; 32.14; 57.16 - 77.87)   | 59.09 (24; 51; 32; 46.29 - 71.89)       |
| General Health, mean (n, median, SD, 95%CI)       | 68.75 (73; 70; 13.07; 65.75 - 71.75)   | 60.59 (74; 68.75; 21.62; 55.66 - 65.51) | 61.25 (55; 60; 21.52; 55.56 - 66.94)    | 63.57 (37; 60; 21; 56.81 - 70.34)      | 67.88 (24; 68.75; 17.88; 60.73 - 75.04) |
| Vitality, mean (n, median, SD, 95%CI)             | 59.12 (73; 60; 12.99; 56.14 - 62.1)    | 43.15 (74; 37.5; 31.74; 35.92 - 50.38)  | 34.28 (55; 30; 24.73; 27.74 - 40.82)    | 40.57 (37; 40; 23.38; 33.04 - 48.11)   | 29.02 (24; 22.5; 22.34; 20.08 - 37.95)  |
| Social Functioning, mean (n, median, SD, 95%CI)   | 56.07 (73; 50; 14.57; 52.72 - 59.41)   | 41.18 (74; 37.5; 28.12; 34.77 - 47.58)  | 44.32 (55; 50; 28.83; 36.7 - 51.94)     | 39.67 (37; 37.5; 30.54; 29.83 - 49.51) | 43.38 (24; 25; 31.9; 30.62 - 56.15)     |
| Role-Emotional, mean (n, median, SD, 95%CI)       | 52.82 (73; 33.33; 45.6; 42.36 - 63.28) | 56.86 (74; 66.67; 44.26; 46.78 - 66.95) | 48.72 (55; 33.33; 44.02; 37.09 - 60.35) | 59.8 (37; 100; 46.26; 44.9 - 74.71)    | 53.97 (24; 66.67; 48.85; 34.42 - 73.51) |
| Mental Health, mean (n, median, SD, 95%CI)        | 64.06 (73; 65; 9.85; 61.8 - 66.32)     | 56.58 (74; 60; 20.47; 51.92 - 61.25)    | 59.04 (55; 60; 21.49; 53.36 - 64.72)    | 57.03 (37; 64; 21.83; 49.99 - 64.06)   | 56.91 (24; 58; 22.09; 48.07 - 65.75)    |

Abbreviations: UMSARS ... unified MSA rating scale, SD ... standard deviation, EQ-5D ... EuroQoL 5 Dimensions, SF-36 ... Short Form (36) Health Survey, CI ... confidence interval

**Supplementary Table 3. Dynamics of characteristic features**

|                                    | Baseline   | 6-Month Follow-up | 12-Month Follow-Up | 18-Month Follow-Up | 24-Month Follow-Up |
|------------------------------------|------------|-------------------|--------------------|--------------------|--------------------|
| N                                  | 141        | 94                | 84                 | 49                 | 43                 |
| Autonomic symptoms, n (%)          | 136 (96.5) | 86 (91.5)         | 81 (96.4)          | 45 (91.8)          | 41 (95.3)          |
| Urinary incontinence, n (%)        | 103 (73)   | 67 (71.3)         | 65 (77.4)          | 37 (75.5)          | 35 (81.4)          |
| Orthostatic hypotension, n (%)     | 80 (56.7)  | 47 (50)           | 35 (41.7)          | 13 (26.5)          | 17 (39.5)          |
| Incomplete bladder emptying, n (%) | 72 (51.1)  | 57 (60.6)         | 42 (50)            | 31 (63.3)          | 22 (51.2)          |
| Constipation, n (%)                | 82 (58.2)  | 58 (61.7)         | 59 (70.2)          | 33 (67.3)          | 32 (74.4)          |
| Parkinsonism, n (%)                | 128 (90.8) | 90 (95.7)         | 74 (88.1)          | 45 (91.8)          | 38 (88.4)          |
| Bradykinesia, n (%)                | 128 (90.8) | 90 (95.7)         | 75 (89.3)          | 45 (91.8)          | 38 (88.4)          |
| Rigidity, n (%)                    | 117 (83)   | 77 (81.9)         | 71 (84.5)          | 40 (81.6)          | 35 (81.4)          |
| Postural instability, n (%)        | 115 (81.6) | 82 (87.2)         | 70 (83.3)          | 42 (85.7)          | 38 (88.4)          |
| Postural tremor, n (%)             | 79 (56)    | 60 (63.8)         | 56 (66.7)          | 32 (65.3)          | 27 (62.8)          |
| Rest tremor, n (%)                 | 50 (35.5)  | 40 (42.6)         | 29 (34.5)          | 20 (40.8)          | 18 (41.9)          |
| Gait freezing, n (%)               | 56 (39.7)  | 47 (50)           | 46 (54.8)          | 25 (51)            | 22 (51.2)          |
| Cerebellar symptoms, n (%)         | 101 (71.6) | 70 (74.5)         | 62 (73.8)          | 37 (75.5)          | 33 (76.7)          |
| Gait ataxia, n (%)                 | 87 (61.7)  | 56 (59.6)         | 50 (59.5)          | 31 (63.3)          | 23 (53.5)          |
| Limb ataxia, n (%)                 | 79 (56)    | 57 (60.6)         | 49 (58.3)          | 33 (67.3)          | 27 (62.8)          |
| Ataxic dysarthria, n (%)           | 77 (54.6)  | 64 (68.1)         | 54 (64.3)          | 30 (61.2)          | 25 (58.1)          |
| Pyramidal involvement, n (%)       | 70 (49.6)  | 51 (54.3)         | 46 (54.8)          | 27 (55.1)          | 23 (53.5)          |
| Babinski sign, n (%)               | 38 (27)    | 31 (33)           | 31 (36.9)          | 22 (44.9)          | 21 (48.8)          |
| Hyperreflexia, n (%)               | 58 (41.1)  | 42 (44.7)         | 37 (44)            | 16 (32.7)          | 15 (34.9)          |

**Supplementary Table 4. Progression of COMPASS change scale scores.**

|                                   | Baseline to 6-months follow-up |                                      | 6 to 12-months follow-up |                                      | 12 to 18-months follow-up |                                      | 18 to 24-months follow-up |                                      |
|-----------------------------------|--------------------------------|--------------------------------------|--------------------------|--------------------------------------|---------------------------|--------------------------------------|---------------------------|--------------------------------------|
|                                   | n of Patients                  | Score, mean (SD, % of maximum score) | n of Patients            | Score, mean (SD, % of maximum score) | n of Patients             | Score, mean (SD, % of maximum score) | n of Patients             | Score, mean (SD, % of maximum score) |
| Orthostatic Intolerance (0-60)    | 28                             | 33 (20•2, 54•9)                      | 25                       | 36•3 (21•8, 60•5)                    | 12                        | 42•9 (11•3, 71•5)                    | 14                        | 28•7 (21•9, 47•9)                    |
| Sexual Failure (0-10, males only) | 18                             | 6•7 (5•1, 66•7)                      | 18                       | 6•7 (4•2, 66•7)                      | 10                        | 6•5 (4•7, 65)                        | 9                         | 3•3 (5, 33•3)                        |
| Bladder Disorder (0-30)           | 28                             | 9•8 (10•6, 32•7)                     | 25                       | 6•4 (8•2, 21•3)                      | 12                        | 9•6 (8•1, 31•9)                      | 14                        | 5•7 (9•8, 19)                        |
| Secretomotor (0-25)               | 28                             | 3•5 (5•1, 14•1)                      | 25                       | 3•7 (5•7, 14•7)                      | 12                        | 4•8 (7•4, 19)                        | 14                        | 3•1 (5•7, 12•6)                      |
| Constipation (0-10)               | 28                             | 2 (4•6, 19•6)                        | 25                       | 3 (4•1, 30)                          | 12                        | 2•5 (4, 25)                          | 14                        | 1•1 (4•9, 10•7)                      |
| Sleep Disorder (0-25)             | 28                             | 4•4 (8•6, 17•4)                      | 25                       | 5•4 (8•4, 21•6)                      | 12                        | 4•6 (5•8, 18•3)                      | 14                        | 2•9 (6•7, 11•4)                      |
| CSS Total Score (0-150/160)       | 28                             | 56•9 (31, 35•6)                      | 25                       | 54•4 (32•6, 34)                      | 12                        | 69•7 (29•1, 43•5)                    | 14                        | 43•6 (43•7, 27•2)                    |

Abbreviations: SD ... standard deviation, COMPASS ... Composite autonomic symptom scale, CSS ... COMPASS change scale
